# Supplementary material for: Cr2O3nanosheet/carbon cloth anode with strong interaction and fast charge transfer for pseudocapacitive energy storage in lithium-ion batteries
Source: Royal Society of Chemistry journal article supplement (doi:10.1039/c9ra07465a), 2019-01-01
Supplement: c9ra07465a1.pdf [file c9ra07465a1.pdf]

# Cr<sub>2</sub>O<sub>3</sub> nanosheet/carbon cloth anode with strong interaction and fast charge transfer for pseudocapacitive energy storage in lithium-ion batteries

DongleiGuo<sup>a</sup>, Mengke Yang<sup>a</sup>, Lilei Zhang<sup>a</sup>, Yicong Li<sup>a</sup>, JinxiangWang<sup>a</sup>, Guilong Liu<sup>a</sup>,  
Naiteng Wu<sup>a,c</sup>, Jang-Kyo Kim<sup>b,\*</sup> and Xianming Liu<sup>a,\*</sup>

<sup>a</sup> Key Laboratory of Function-oriented Porous Materials, College of Chemistry and Chemical Engineering, Luoyang Normal University, Luoyang, 471934, P. R. China.

<sup>b</sup> Department of Mechanical and Aerospace Engineering, Hong Kong University of Science and Technology, Clear Water Bay, Kowloon, Hong Kong, P. R. China.

<sup>c</sup>College of Materials and Chemical Engineering, China Three Gorges University, Yichang, 443002, P. R. China.

\*Email: mejkkim@ust.hk(Jang-Kyo Kim), myclxm@163.com(Xianming Liu)

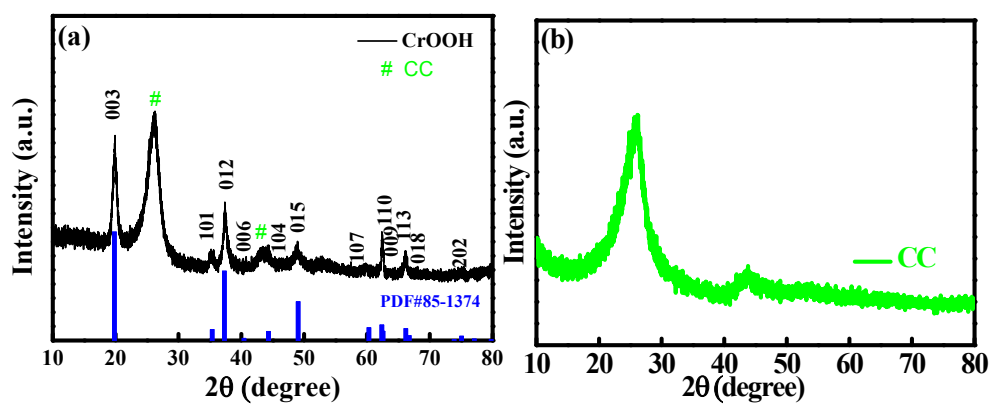

Fig.S1. XRD patterns of (a) CrOOH-CC and (b) CC.

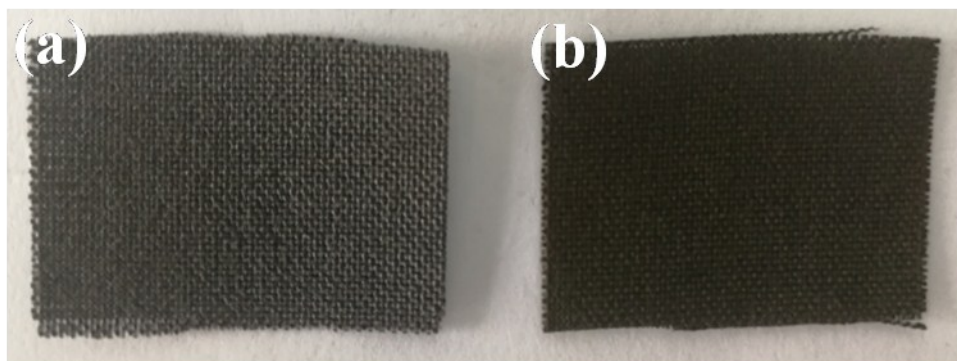

**Fig.S2.** Digital photographs of (a)  $\text{Cr}_2\text{OOH-CC}$  and (b)  $\text{Cr}_2\text{O}_3\text{-CC}$ .

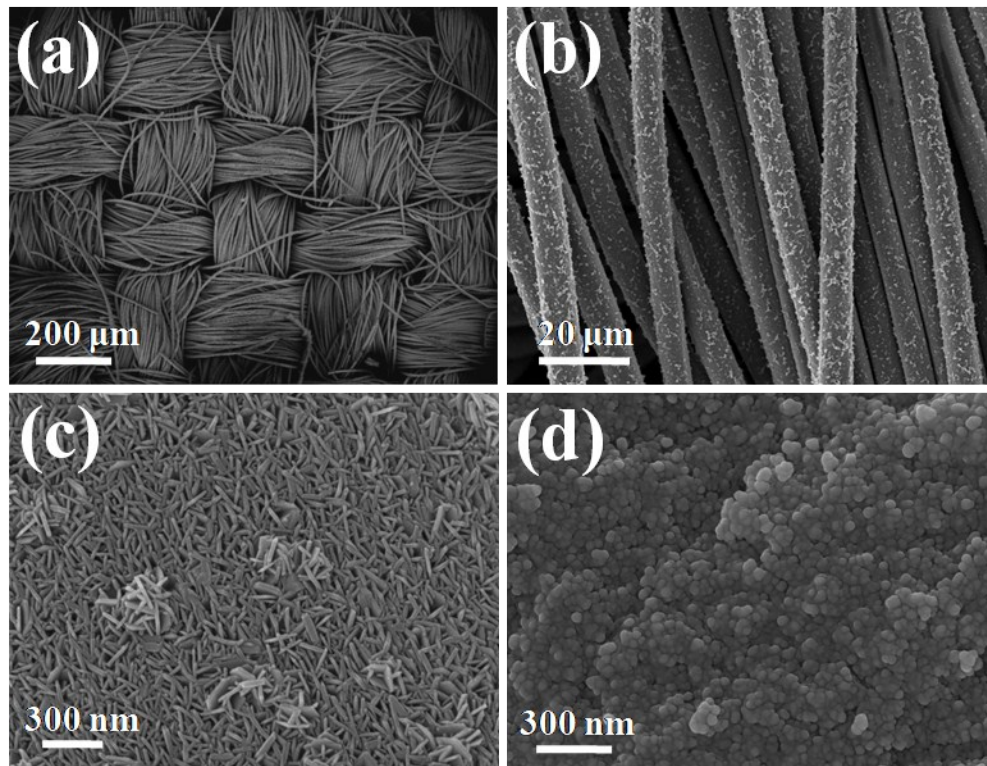

**Fig.S3.** (a-c) FESEM images of CrOOH-CC and (d) Cr<sub>2</sub>O<sub>3</sub> NPs.

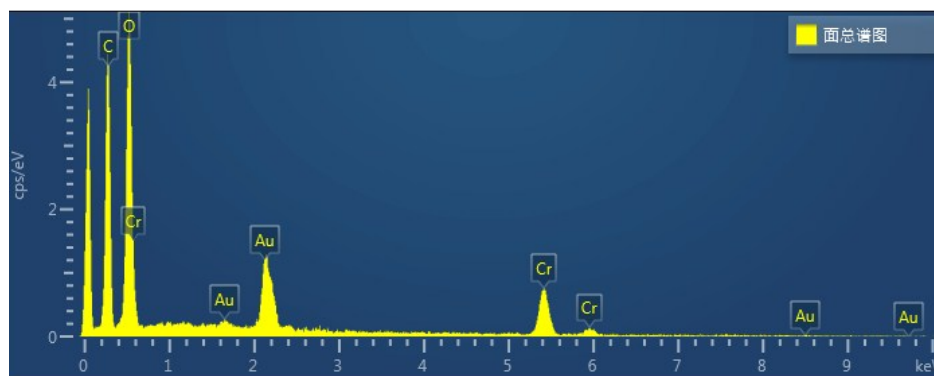

**Fig.S4.** EDS spectrum of  $\text{Cr}_2\text{O}_3\text{-CC}$ .

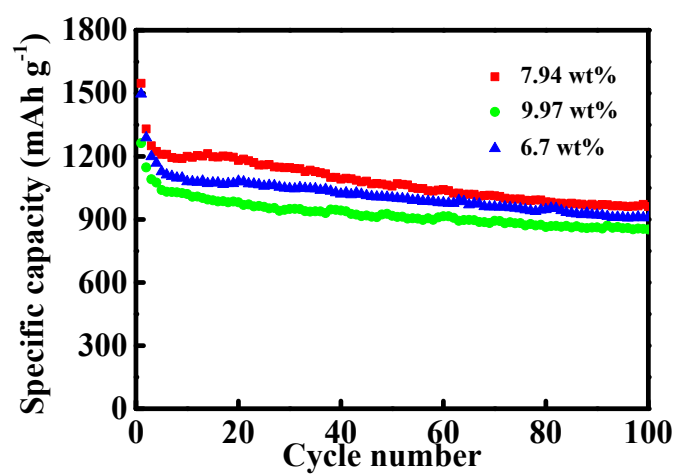

**Fig.S5.** Cycling performances of Cr<sub>2</sub>O<sub>3</sub>-CC with different mass loadings of Cr<sub>2</sub>O<sub>3</sub> at the current density of 0.1 A g<sup>-1</sup>.

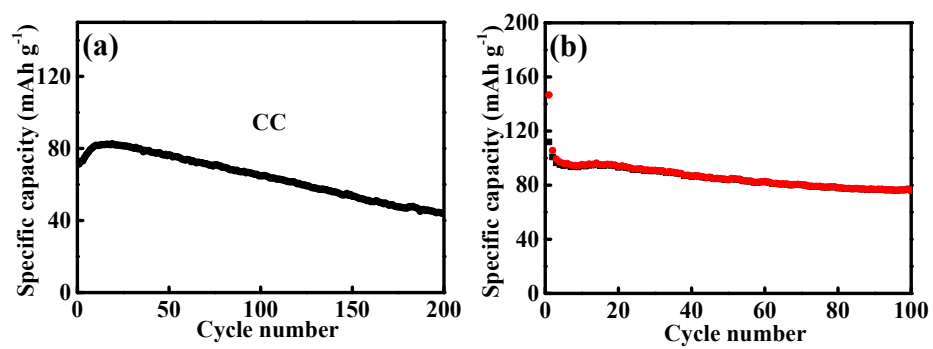

**Fig.S6.** Cyclic performances of CC (a) and Cr<sub>2</sub>O<sub>3</sub>-CC (b) based on mass of the whole electrode (Cr<sub>2</sub>O<sub>3</sub> and CC) at the current density of 0.1 A g<sup>-1</sup>.

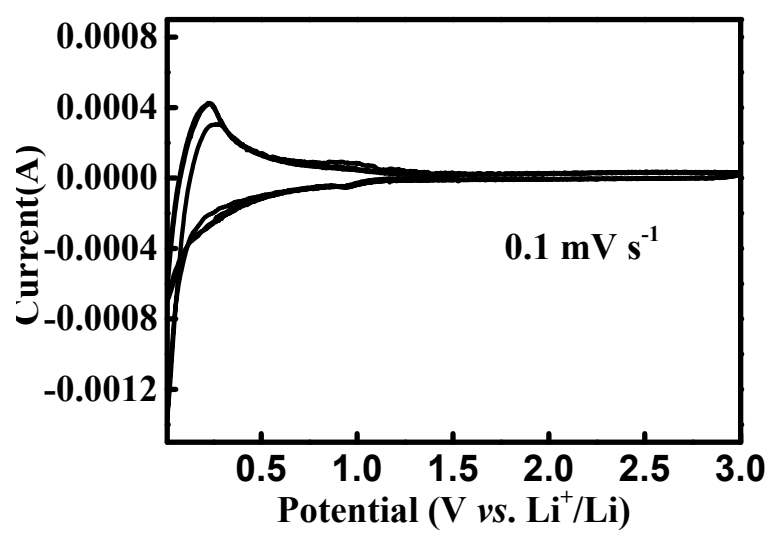

**Fig.S7.** CV curves of Cr<sub>2</sub>O<sub>3</sub>-CC for the initial five cycles at 0.1 mV s<sup>-1</sup>.



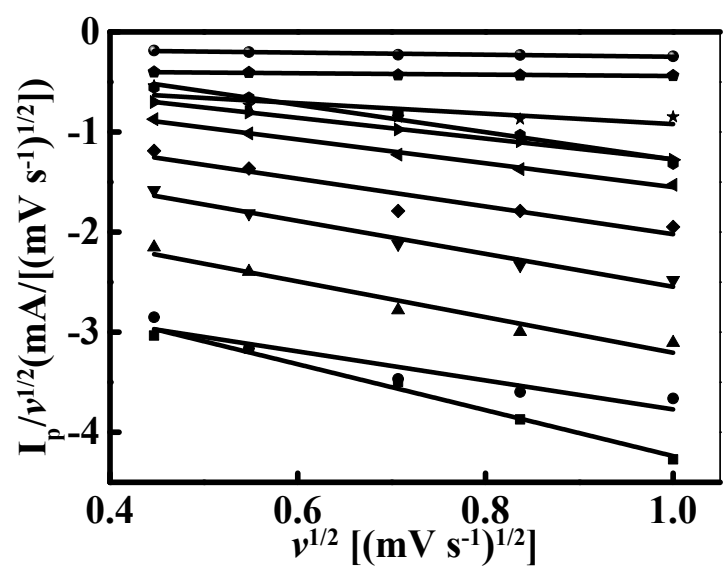

**Fig.S8.**  $I_p/v^{1/2}$  vs  $v^{1/2}$  plots of the  $\text{Cr}_2\text{O}_3$ -CC electrode used to obtain the coefficients,  $k_1$  and  $k_2$ , according to Equation (2).

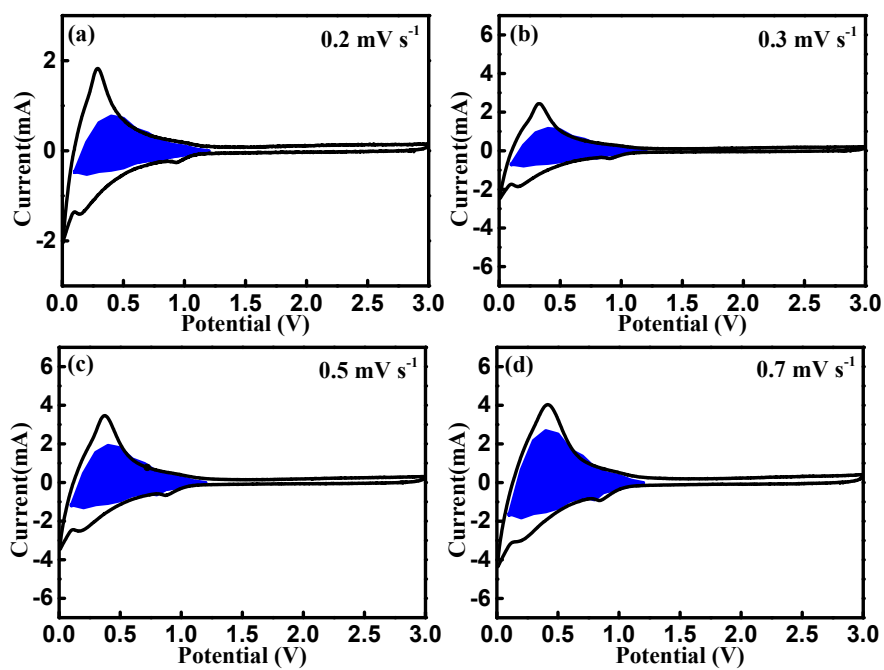

**Fig.S9.** Pseudocapacitive contributions to charge storage of the Cr<sub>2</sub>O<sub>3</sub>-CC electrode at different scan rates of (a) 0.2, (b) 0.3, (c) 0.5, (d) 0.7 mV s<sup>-1</sup>.

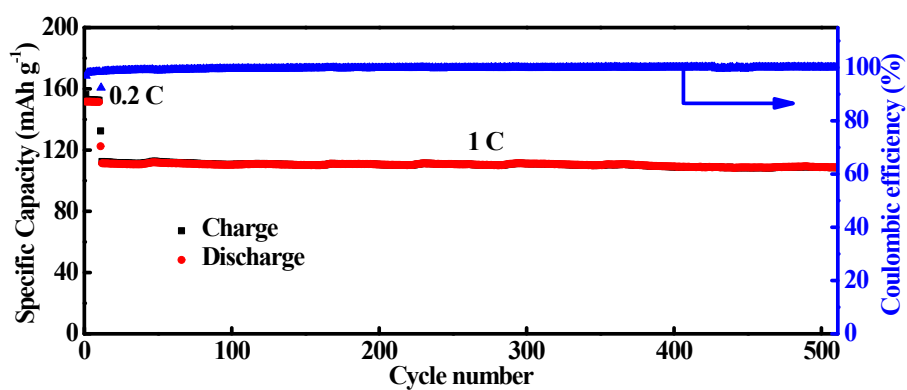

**Fig.S10.** Long-term cyclic stability and corresponding Coulombic efficiency of Cr<sub>2</sub>O<sub>3</sub>-CC//LFP@C full cell at 1 C.

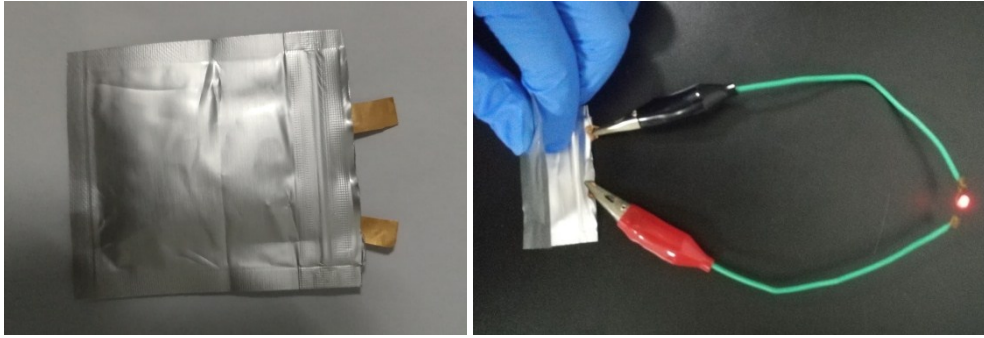

**Fig.S11.** The digital pictures for the bending lithium-ion full cell that lights a LED.

**Table S1.** Impedance parameters of Cr<sub>2</sub>O<sub>3</sub>-CC and Cr<sub>2</sub>O<sub>3</sub> NPs fitted with the circuit model of R(QR)(Q(RW))

| Samples                               | R <sub>s</sub><br>(Ω) | R <sub>ct</sub> (Ω) | Z <sub>w</sub><br>(Ω) | D <sub>Li+</sub> (cm <sup>2</sup> s <sup>-1</sup> ) |
|---------------------------------------|-----------------------|---------------------|-----------------------|-----------------------------------------------------|
| Cr <sub>2</sub> O <sub>3</sub> -CC    | 1.56                  | 140                 | 2.4                   | 6.4 x 10 <sup>-12</sup>                             |
| Cr <sub>2</sub> O <sub>3</sub><br>NPs | 6                     | 217                 | 5.4                   | 7.2 x 10 <sup>-13</sup>                             |
